# Supplementary material for: Does interpregnancy BMI change affect the risk of complications in the second pregnancy? Analysis of pooled data from Aberdeen, Finland and Malta
Source: PubMed Central journal article supplement (PMC8748194; doi:10.1038/s41366-021-00971-7), 2021-10-04
Supplement: 41366_2021_971_MOESM1_ESM.pdf [file 41366_2021_971_MOESM1_ESM.pdf]

**a**

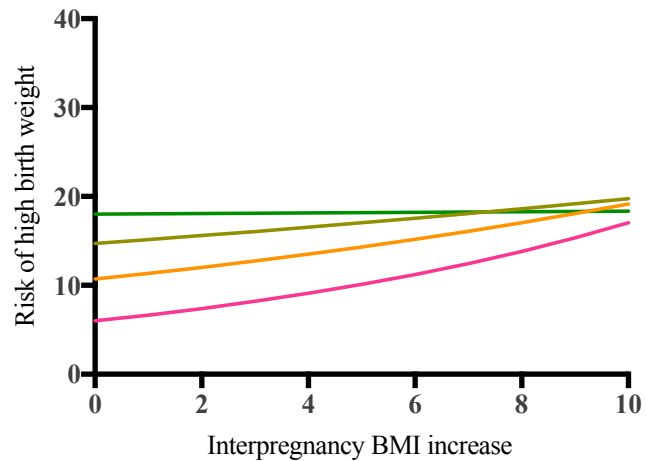

Underweight  
Healthy weight  
Overweight  
Obesity

**b**

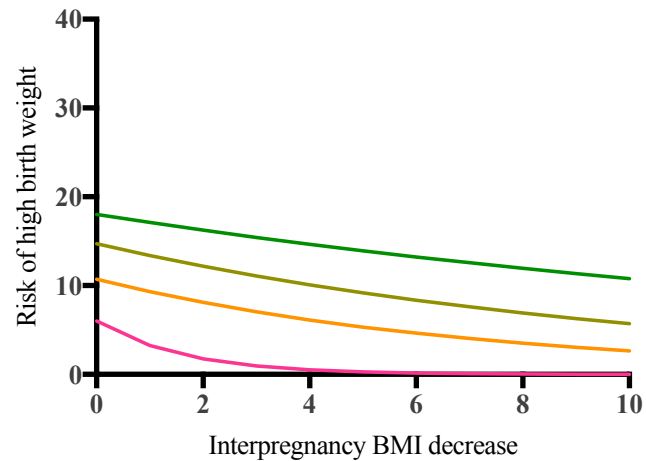

Underweight  
Healthy weight  
Overweight  
Obesity
